# Supplementary material
Source: ML conference proceedings conference paper supplement (https://openreview.net/forum?id=Kq50iDD6cx)
Supplement: supplementary_material [file appendix.pdf › appendix.pdf]

## Appendix

### A SURROGATE DEMONSTRATOR CLASSIFICATION TRAINING

We provide more details about the algorithm and theory of Surrogate Demonstrator Classification training.

---

**Algorithm 3** Learning scoring model

---

```

1: Input:  $\{(i, D_i)\}_{i=1}^m, \{\alpha_i\}_{i=1}^m$ , and  $\alpha'$ 
2: Initialization: scoring model  $f_\phi(s, a)$ 
3: Compute of  $T(\cdot) = [T_1(\cdot), \dots, T_m(\cdot)]$  using Eq. 5 based on  $\{\alpha_i\}_{i=1}^m$  and  $\alpha'$ 
4: for  $t = 1, 2, \dots$  do
5:   Sample examples:  $\bar{z}, (s, a) \sim \{(i, D_i)\}_{i=1}^m$ 
6:   Update  $f_\phi$  by minimizing the empirical risk from Eq. 6
7: end for
8: Return  $f_\phi$ 

```

---

We consider demonstrator heterogeneity, i.e., there  $\exists i, j \in [m], i \neq j$ , such that  $\alpha_i \neq \alpha_j$ . According to Lu et al. (2021),  $f_{\phi_{\text{sur}}^*}$  that recovered by removing transformation layer  $T(\cdot)$  of the optimal surrogate classifier  $f_{\phi^*}$  (the minimizer of  $\mathbb{E}_{(s,a) \sim \rho} [\ell(\bar{f}_\phi(s, a), \bar{z})] = \mathbb{E}_{(s,a) \sim \rho} [\ell(T(f_\phi(s, a)), \bar{z})]$ ) is identical to the optimal classifier  $f_{\phi^*}$  that minimize the risk  $\mathbb{E}_{(s,a) \sim \rho} [\ell(f_\phi(s, a), z)]$ , which is not possible if the heterogeneity setting is invalid. Thus, through the transformation function transformation  $T(\cdot)$ , the optimality scoring model  $f_{\phi^*}$  can be learned by minimizing the surrogate classification risk in Eq. 6.

### B PROOF OF THEOREM 1

*Proof.* We first prove that the sequence  $\{\mathcal{L}(\phi^t, \alpha^t)\}$  is non-increasing. If  $\mathcal{L}(\phi, \alpha)$  is lower-bounded (e.g., by zero in many loss formulations), then by the monotone convergence theorem, the sequence must converge.

$$\mathcal{L}(\phi, \alpha) = \mathbb{E}_{(s,a) \sim \rho} [\ell(T_\alpha(f_\phi(s, a)), \bar{z})] \quad (9)$$

Minimizing the cross-entropy loss in Eq. 9 is equivalent to maximizing a log likelihood (Shangnan & Wang, 2021). We define a log likelihood function through the conditional distribution  $p(\bar{z}|(s, a))$  in the form of discriminative training. With scoring model parameters and hidden parameters of expertise levels, the log likelihood ( $ll$ ) can be formulated as

$$ll(\phi, \alpha) := \ln p(\bar{z}|(s, a), \phi) = \sum_{\alpha} p(\alpha) \ln p(\bar{z}|(s, a), \phi) \quad (10)$$

To prove that  $\{\mathcal{L}(\phi^t, \alpha^t)\}$  is monotonically non-increasing, we only have to prove  $\{ll(\phi^t, \alpha^t)\}$  is monotonically non-decreasing, i.e.,  $ll(\phi^{t+1}, \alpha^{t+1}) \geq ll(\phi^t, \alpha^t)$ .

We define  $L(q, \phi) := \sum_{\alpha} q(\alpha) \ln \frac{p(\bar{z}, \alpha|(s, a), \phi)}{q(\alpha)}$ ,  $q := q(\alpha)$ , and  $p := p(\alpha|\bar{z}, (s, a), \phi)$

$$\begin{aligned}
L(q, \phi) &= \sum_{\alpha} q(\alpha) \ln \frac{p(\bar{z}, \alpha|(s, a), \phi)}{q(\alpha)} \\
&= \sum_{\alpha} q(\alpha) [\ln p(\alpha|\bar{z}, (s, a), \phi) + \ln p(\bar{z}|(s, a), \phi) - \ln q(\alpha)] \\
&= \sum_{\alpha} q(\alpha) \ln \frac{p(\alpha|\bar{z}, (s, a), \phi)}{q(\alpha)} + \sum_{\alpha} q(\alpha) \ln p(\bar{z}|(s, a), \phi) \\
&= -KL(q||p) + \ln p(\bar{z}|(s, a), \phi)
\end{aligned} \quad (11)$$

Then, the likelihood  $ll(\phi, \alpha)$  can be represented as

$$\begin{aligned} \ln p(d|(s, a), \phi) &= L(q, \phi) + KL(q||p), \\ &\geq L(q, \phi) \end{aligned} \quad (12)$$

Since  $KL(q||p) \geq 0$ ,  $L(q, \phi)$  is the lower bound of  $ll(\phi, \alpha)$ .

For likelihood function  $ll(\phi^t, \alpha^t)$  at iteration  $t$ ,

$$\begin{aligned} ll(\phi^t, \alpha^t) &= \ln p(\bar{z}|(s, a), \phi^t) \\ &= L(q(\alpha^t), \phi^t) + KL(q(\alpha^t)||p(\alpha|\bar{z}, (s, a), \phi^t)) \end{aligned} \quad (13)$$

Since  $L(q(\alpha^t), \phi^t) = \ln p(\bar{z}|(s, a), \phi^t) - KL(q(\alpha^t)||p(\alpha|\bar{z}, (s, a), \phi^t))$  is the lower bound  $ll(\phi^t, \alpha^t)$ . We update  $\alpha^t$  by letting  $q(\alpha^t) = p(\alpha|\bar{z}, (s, a), \phi^t)$  to maximize the lower bound, where  $p(\alpha|\bar{z}, (s, a), \phi^t)$  can be calculated based on the second equation in Eq.7. Thus,  $KL(q(\alpha^{t+1})||p(\alpha|\bar{z}, (s, a), \phi^t)) = 0$ . Thus,  $ll(\phi^t, \alpha^{t+1})$  can be expressed as

$$\begin{aligned} ll(\phi^t, \alpha^{t+1}) &= \ln p(\bar{z}|(s, a), \phi^t) \\ &= L(q(\alpha^{t+1}), \phi^t) + KL(q(\alpha^{t+1})||p(\alpha|\bar{z}, (s, a), \phi^t)) \\ &= L(q(\alpha^{t+1}), \phi^t) \end{aligned} \quad (14)$$

By updating  $\alpha$ , we increase the lower bound of  $ll(\phi^t, \alpha^{t+1})$  equals to  $\ln p(\bar{z}|(s, a), \phi^t)$ . Then we maximize  $ll(\phi^t, \alpha^{t+1})$  with regard to  $\phi$  using a gradient decent method,  $ll(\phi^{t+1}, \alpha^{t+1})$  must be not smaller than  $ll(\phi^t, \alpha^{t+1})$ . Finally, we have  $ll(\phi^{t+1}, \alpha^{t+1}) \geq ll(\phi^t, \alpha^{t+1}) = \ln p(\bar{z}|(s, a), \phi^t) = ll(\phi^t, \alpha^t)$

□

## C EXPERIMENT DETAILS

### C.1 DETAILED RESULTS

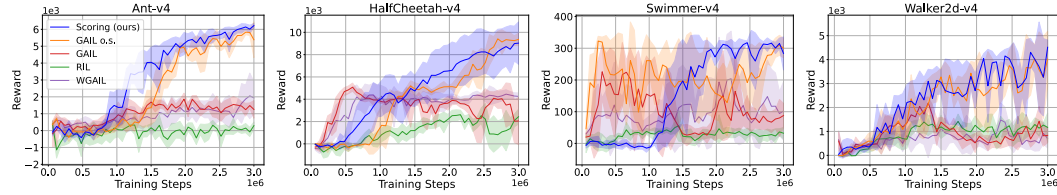

(a) General expertise test

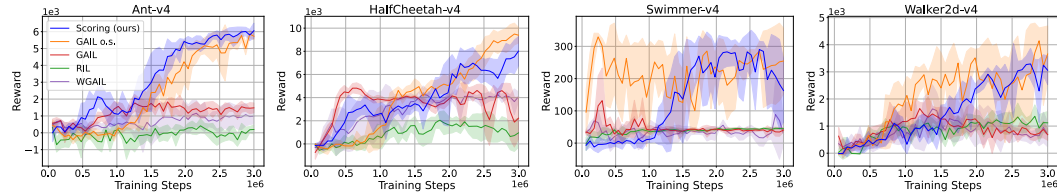

(b) Low expertise test

Figure 3: Performance comparison (mean  $\pm$  std, shown as shaded region) with baselines. Supplementary results for Sec. 4.2

Table 5: Performance (reward) of checkpoints used as optimal and suboptimal policies across environments. Values are reported as mean  $\pm$  standard deviation.

| Environment    | Optimal policy $\pi^*$ | Suboptimal policy $\pi^{\text{sub}}$ |
|----------------|------------------------|--------------------------------------|
| Ant-v4         | 6766.26 $\pm$ 109.70   | 1266.37 $\pm$ 533.96                 |
| HalfCheetah-v4 | 15947.53 $\pm$ 39.08   | 4030.23 $\pm$ 169.82                 |
| Swimmer-v4     | 339.80 $\pm$ 1.15      | 41.60 $\pm$ 2.34                     |
| Walker-v4      | 5638.94 $\pm$ 49.76    | 554.38 $\pm$ 267.99                  |

Table 6: True expertise levels  $\{\alpha_i\}_{i=1}^m$  for different numbers of demonstrators across two tests. Expertise levels are uniformly distributed within each range.

| Demonstrator                  | 1     | 2     | 3     | 4     | 5     | 6     | 7     | 8     |
|-------------------------------|-------|-------|-------|-------|-------|-------|-------|-------|
| <b>General expertise test</b> |       |       |       |       |       |       |       |       |
| 2 demonstrators               | 0.100 | 0.900 | –     | –     | –     | –     | –     | –     |
| 4 demonstrators               | 0.100 | 0.366 | 0.633 | 0.900 | –     | –     | –     | –     |
| 6 demonstrators               | 0.100 | 0.260 | 0.420 | 0.580 | 0.740 | 0.900 | –     | –     |
| 8 demonstrators               | 0.100 | 0.214 | 0.329 | 0.443 | 0.557 | 0.671 | 0.786 | 0.900 |
| <b>Low expertise test</b>     |       |       |       |       |       |       |       |       |
| 2 demonstrators               | 0.050 | 0.150 | –     | –     | –     | –     | –     | –     |
| 4 demonstrators               | 0.050 | 0.083 | 0.117 | 0.150 | –     | –     | –     | –     |
| 6 demonstrators               | 0.050 | 0.070 | 0.090 | 0.110 | 0.130 | 0.150 | –     | –     |
| 8 demonstrators               | 0.050 | 0.064 | 0.079 | 0.093 | 0.107 | 0.121 | 0.136 | 0.150 |

Table 7: Estimated expertise levels  $\{\hat{\alpha}_i\}_{i=1}^m$ , showing the mean estimate and the mean  $\pm$  standard deviation of error across five random seeds. True values are shown separately. Supplementary results for Sec. 4.3

| Demonstrator                  | 1     | 2     | 3     | 4     | 5     | 6     | Mean error $\pm$ std             |
|-------------------------------|-------|-------|-------|-------|-------|-------|----------------------------------|
| <b>General expertise test</b> |       |       |       |       |       |       |                                  |
| Ant-v4                        | 0.100 | 0.260 | 0.420 | 0.580 | 0.740 | 0.900 | $(2.67 \pm 1.28) \times 10^{-4}$ |
| HalfCheetah-v4                | 0.100 | 0.260 | 0.420 | 0.580 | 0.740 | 0.900 | $(2.00 \pm 2.00) \times 10^{-5}$ |
| Hopper-v4                     | 0.101 | 0.259 | 0.418 | 0.575 | 0.734 | 0.892 | $(3.83 \pm 2.73) \times 10^{-3}$ |
| Swimmer-v4                    | 0.100 | 0.260 | 0.420 | 0.580 | 0.740 | 0.900 | $(2.00 \pm 2.00) \times 10^{-5}$ |
| Walker2d-v4                   | 0.100 | 0.260 | 0.420 | 0.581 | 0.741 | 0.900 | $(3.27 \pm 3.12) \times 10^{-4}$ |
| True expertise levels         | 0.100 | 0.260 | 0.420 | 0.580 | 0.740 | 0.900 |                                  |
| <b>Low expertise test</b>     |       |       |       |       |       |       |                                  |
| Ant-v4                        | 0.148 | 0.170 | 0.187 | 0.207 | 0.222 | 0.246 | $(9.65 \pm 0.24) \times 10^{-2}$ |
| HalfCheetah-v4                | 0.086 | 0.105 | 0.127 | 0.146 | 0.167 | 0.190 | $(3.67 \pm 0.15) \times 10^{-2}$ |
| Hopper-v4                     | 0.156 | 0.176 | 0.195 | 0.216 | 0.231 | 0.257 | $(1.05 \pm 0.02) \times 10^{-1}$ |
| Swimmer-v4                    | 0.077 | 0.100 | 0.118 | 0.139 | 0.158 | 0.177 | $(2.81 \pm 0.11) \times 10^{-2}$ |
| Walker2d-v4                   | 0.179 | 0.206 | 0.219 | 0.248 | 0.263 | 0.287 | $(1.34 \pm 0.04) \times 10^{-1}$ |
| True expertise levels         | 0.050 | 0.070 | 0.090 | 0.110 | 0.130 | 0.150 |                                  |

Table 8: Classification / Labeling results (mean  $\pm$  std). Stage 1: labeling using the pretrained scoring model. Stage 2: relabeling using the fine-tuned scoring model. TP (true positive), TN (true negative), FP (false positive), FN (false negative). Improvement (%) shows the Stage 1  $\rightarrow$  Stage 2 percentage change of accuracy and precision after relabeling. Supplementary results for Sec. 4.4

| Environment                   | Stage | TP                 | TN                  | FP                 | FN                | Accuracy / Precision | Improvement (%) |
|-------------------------------|-------|--------------------|---------------------|--------------------|-------------------|----------------------|-----------------|
| <b>General expertise test</b> |       |                    |                     |                    |                   |                      |                 |
| Ant-v4                        | 1     | 14988.6 $\pm$ 3.9  | 14984.2 $\pm$ 10.1  | 15.8 $\pm$ 10.1    | 11.4 $\pm$ 3.9    | 0.9991 / 0.9989      | -               |
|                               | 2     | 14984.0 $\pm$ 5.5  | 14984.0 $\pm$ 5.5   | 16.0 $\pm$ 5.5     | 16.0 $\pm$ 5.5    | 0.9989 / 0.9989      | -0.02 / 0.00    |
| HalfCheetah-v4                | 1     | 15000.0 $\pm$ 0.0  | 14999.4 $\pm$ 0.8   | 0.6 $\pm$ 0.8      | 0.0 $\pm$ 0.0     | 1.0000 / 1.0000      | -               |
|                               | 2     | 15000.0 $\pm$ 0.0  | 15000.0 $\pm$ 0.0   | 0.0 $\pm$ 0.0      | 0.0 $\pm$ 0.0     | 1.0000 / 1.0000      | 0.00 / 0.00     |
| Swimmer-v4                    | 1     | 15000.0 $\pm$ 0.0  | 14999.4 $\pm$ 1.2   | 0.6 $\pm$ 1.2      | 0.0 $\pm$ 0.0     | 1.0000 / 1.0000      | -               |
|                               | 2     | 14991.4 $\pm$ 16.2 | 14991.4 $\pm$ 16.2  | 8.6 $\pm$ 16.2     | 8.6 $\pm$ 16.2    | 0.9994 / 0.9994      | -0.06 / -0.06   |
| Walker2d-v4                   | 1     | 14992.0 $\pm$ 2.2  | 14985.0 $\pm$ 6.1   | 15.0 $\pm$ 6.1     | 8.0 $\pm$ 2.2     | 0.9992 / 0.9990      | -               |
|                               | 2     | 14990.4 $\pm$ 1.6  | 14990.4 $\pm$ 1.6   | 9.6 $\pm$ 1.6      | 9.6 $\pm$ 1.6     | 0.9994 / 0.9994      | 0.02 / 0.04     |
| <b>Low expertise test</b>     |       |                    |                     |                    |                   |                      |                 |
| Ant-v4                        | 1     | 2997.6 $\pm$ 1.5   | 24101.4 $\pm$ 735.5 | 2898.6 $\pm$ 735.5 | 2.4 $\pm$ 1.5     | 0.9033 / 0.5178      | -               |
|                               | 2     | 2947.0 $\pm$ 32.9  | 26947.0 $\pm$ 32.9  | 53.0 $\pm$ 32.9    | 53.0 $\pm$ 32.9   | 0.9965 / 0.9823      | 10.32 / 89.71   |
| HalfCheetah-v4                | 1     | 3000.0 $\pm$ 0.0   | 25898.2 $\pm$ 355.8 | 1101.8 $\pm$ 355.8 | 0.0 $\pm$ 0.0     | 0.9633 / 0.7368      | -               |
|                               | 2     | 2997.4 $\pm$ 5.2   | 26997.4 $\pm$ 5.2   | 2.6 $\pm$ 5.2      | 2.6 $\pm$ 5.2     | 0.9998 / 0.9991      | 3.79 / 35.60    |
| Swimmer-v4                    | 1     | 3000.0 $\pm$ 0.0   | 26156.2 $\pm$ 393.5 | 843.8 $\pm$ 393.5  | 0.0 $\pm$ 0.0     | 0.9719 / 0.7884      | -               |
|                               | 2     | 2637.2 $\pm$ 290.4 | 26637.2 $\pm$ 290.4 | 362.8 $\pm$ 290.4  | 362.8 $\pm$ 290.4 | 0.9758 / 0.8791      | 0.40 / 11.50    |
| Walker2d-v4                   | 1     | 2965.0 $\pm$ 42.7  | 22953.2 $\pm$ 890.1 | 4046.8 $\pm$ 890.1 | 35.0 $\pm$ 42.7   | 0.8639 / 0.4301      | -               |
|                               | 2     | 2772.0 $\pm$ 170.3 | 26772.0 $\pm$ 170.3 | 228.0 $\pm$ 170.3  | 228.0 $\pm$ 170.3 | 0.9848 / 0.9240      | 13.99 / 114.83  |

Table 9: Ablation results on the impact of relabeling and early stopping in Stage 2 on Ant-v4 task. Reported as mean  $\pm$  std of reward across last five checkpoints. Supplementary results for Sec. 4.5

| Method                  | Expertise [0.1 – 0.9]                | Expertise [0.05 – 0.15]              |
|-------------------------|--------------------------------------|--------------------------------------|
| Scoring (ours)          | <b>6084.6 <math>\pm</math> 146.9</b> | <b>5932.0 <math>\pm</math> 335.2</b> |
| Scoring (no relabel)    | 5593.0 $\pm$ 564.2                   | 3316.2 $\pm$ 1207.8                  |
| Scoring (no early stop) | 2129.8 $\pm$ 2205.8                  | 1018.2 $\pm$ 250.0                   |

Table 10: Ablation study on top-k hyperparameter on Ant-v4 task. Reported as mean  $\pm$  std of reward across last five checkpoints. Supplementary results for Sec. 4.5

| Top-k fraction | Expertise [0.1 – 0.9]                | Expertise [0.05 – 0.15]              |
|----------------|--------------------------------------|--------------------------------------|
| 0.05           | –                                    | 5887.6 $\pm$ 263.8                   |
| 0.1            | 5403.8 $\pm$ 378.7                   | <b>5932.0 <math>\pm</math> 335.2</b> |
| 0.15           | –                                    | 3663.4 $\pm$ 1950.9                  |
| 0.2            | –                                    | 1756.6 $\pm$ 902.6                   |
| 0.3            | 5809.0 $\pm$ 274.8                   | –                                    |
| 0.5            | <b>6084.6 <math>\pm</math> 146.9</b> | –                                    |
| 0.55           | 4109.2 $\pm$ 2204.9                  | –                                    |
| 0.6            | 3641.0 $\pm$ 1237.7                  | –                                    |
| 0.7            | 2383.0 $\pm$ 1059.7                  | –                                    |

Table 11: Estimated expertise levels  $\{\hat{\alpha}_i\}_{i=1}^m$  on Ant-v4 task, showing the mean estimate and the mean  $\pm$  standard deviation of error across five random seeds. True values are shown separately. Results shown for different numbers of demonstrators (2, 4, 6, 8). Supplementary results for Sec. 4.5

| Demonstrator                  | Type | 1     | 2     | 3     | 4     | 5     | 6     | 7     | 8     | Mean error $\pm$ std             |
|-------------------------------|------|-------|-------|-------|-------|-------|-------|-------|-------|----------------------------------|
| <b>General expertise test</b> |      |       |       |       |       |       |       |       |       |                                  |
| 2 demonstrators               | Est. | 0.101 | 0.899 | -     | -     | -     | -     | -     | -     | $(9.60 \pm 1.60) \times 10^{-4}$ |
|                               | True | 0.100 | 0.900 | -     | -     | -     | -     | -     | -     | -                                |
| 4 demonstrators               | Est. | 0.100 | 0.366 | 0.633 | 0.899 | -     | -     | -     | -     | $(4.50 \pm 2.96) \times 10^{-4}$ |
|                               | True | 0.100 | 0.367 | 0.633 | 0.900 | -     | -     | -     | -     | -                                |
| 6 demonstrators               | Est. | 0.100 | 0.260 | 0.420 | 0.580 | 0.740 | 0.900 | -     | -     | $(2.67 \pm 1.28) \times 10^{-4}$ |
|                               | True | 0.100 | 0.260 | 0.420 | 0.580 | 0.740 | 0.900 | -     | -     | -                                |
| 8 demonstrators               | Est. | 0.100 | 0.214 | 0.329 | 0.443 | 0.557 | 0.671 | 0.785 | 0.899 | $(2.50 \pm 1.97) \times 10^{-4}$ |
|                               | True | 0.100 | 0.214 | 0.329 | 0.443 | 0.557 | 0.671 | 0.786 | 0.900 | -                                |
| <b>Low expertise test</b>     |      |       |       |       |       |       |       |       |       |                                  |
| 2 demonstrators               | Est. | 0.193 | 0.287 | -     | -     | -     | -     | -     | -     | $(1.40 \pm 0.03) \times 10^{-1}$ |
|                               | True | 0.050 | 0.150 | -     | -     | -     | -     | -     | -     | -                                |
| 4 demonstrators               | Est. | 0.106 | 0.143 | 0.173 | 0.208 | -     | -     | -     | -     | $(5.77 \pm 0.16) \times 10^{-2}$ |
|                               | True | 0.050 | 0.083 | 0.117 | 0.150 | -     | -     | -     | -     | -                                |
| 6 demonstrators               | Est. | 0.148 | 0.170 | 0.187 | 0.207 | 0.222 | 0.246 | -     | -     | $(9.65 \pm 0.24) \times 10^{-2}$ |
|                               | True | 0.050 | 0.070 | 0.090 | 0.110 | 0.130 | 0.150 | -     | -     | -                                |
| 8 demonstrators               | Est. | 0.073 | 0.087 | 0.101 | 0.115 | 0.130 | 0.144 | 0.160 | 0.175 | $(2.31 \pm 0.10) \times 10^{-2}$ |
|                               | True | 0.050 | 0.064 | 0.079 | 0.093 | 0.107 | 0.121 | 0.136 | 0.150 | -                                |

Table 12: Ablation on the different number of demonstrators for Ant-v4 task. Reported numbers are mean  $\pm$  std of reward across last five checkpoints. Supplementary results for Sec. 4.5

| Scoring Samples | Expertise [0.1 – 0.9]                | Expertise [0.05 – 0.15]              |
|-----------------|--------------------------------------|--------------------------------------|
| 2               | 5634.0 $\pm$ 617.8                   | 6050.6 $\pm$ 120.4                   |
| 4               | 5934.0 $\pm$ 264.3                   | 5637.2 $\pm$ 772.5                   |
| 6               | <b>6084.6 <math>\pm</math> 146.9</b> | 5932.0 $\pm$ 335.2                   |
| 8               | 5735.0 $\pm$ 225.6                   | <b>6146.6 <math>\pm</math> 107.2</b> |

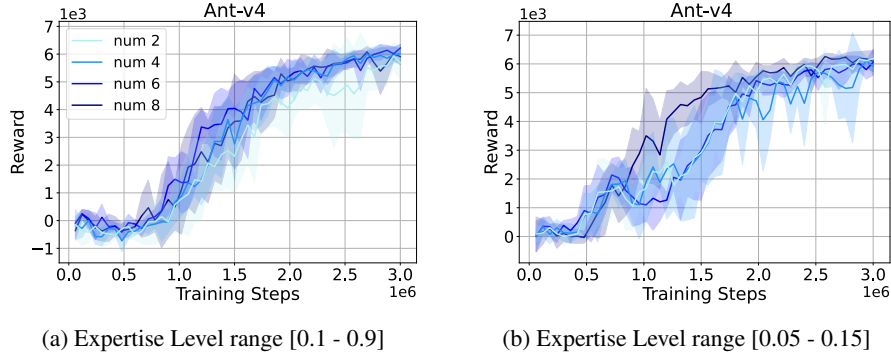

Figure 4: Ablation on the different number of demonstrators for Ant-v4 task (mean  $\pm$  std, shown as shaded region). Supplementary results for Sec. 4.5

**Number of Demonstrators:** The results in Tab. 11 show that the estimation error of expertise levels in low expertise test increase when the number of demonstrators is reduced. However, the reward obtained by the IL agent in Stage 2 (see Tab. 12) does not decrease substantially. These results demonstrate the robustness of our method with respect to varying demonstrator counts in terms of IL performance.

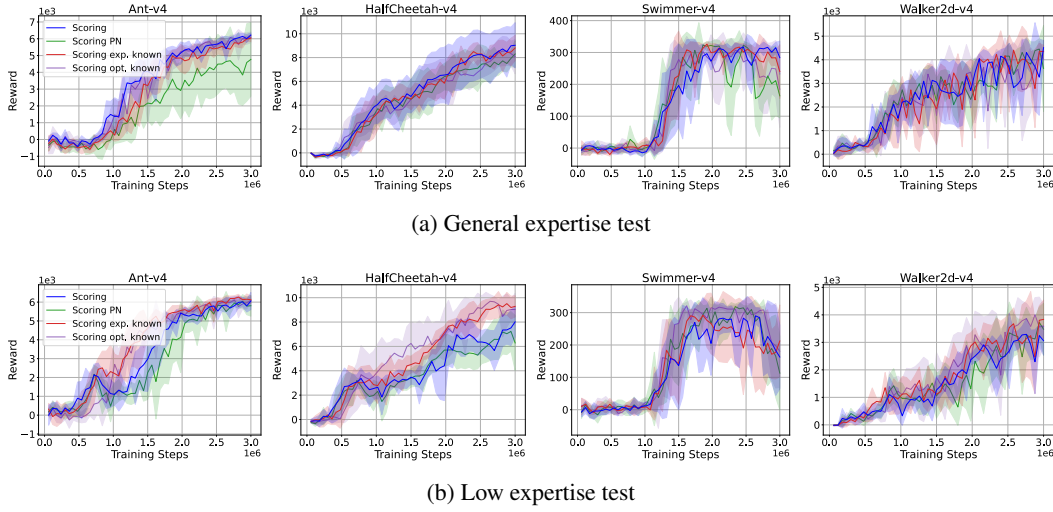

Figure 5: Comparative analysis of our method and its variants.

## C.2 ADDITIONAL ANALYSIS OF METHOD VARIANTS

We analyze our algorithm by comparing it against several variants under different settings. (1) **Scoring**: original method; (2) **Scoring PN**: in Stage 2, the first term  $\hat{\mathbb{E}}_{(s,a) \sim \rho} [\mathcal{L}(f_\phi(s, a))]$  (demonstration discriminative loss) in Eq. 8 is replaced with a PN loss  $\hat{\mathbb{E}}_{(s,a) \sim \hat{\rho}^{\pi^*}} [\mathcal{L}_{PN}(f_\phi(s, a, s', a'))]$ , where  $\mathcal{L}_{PN}(f_\phi(s, a, s', a')) = \log(1 - f_\phi(s, a)) + \log(f_\phi(s', a'))$ , and  $\pi^{\text{sub}}$  represent the pseudo-suboptimal data inferred from  $D_{\text{subopt}} = D \setminus D_{\text{opt}}$ . (3) **Scoring exp. known**: the true expertise levels are assumed to be given in both Stage 1 and 2. (4) **Scoring opt. known**: in Stage 2,  $D_{\text{opt}}$  is provided based on the true labels.

The results in Fig. 5 show that, overall, all methods achieve comparable performance. **Scoring PN** yields slightly lower rewards in general expertise test on Ant and Swimmer tasks, which may be attributed to the overconfidence issue introduced by self-labeling when using the PN loss. This result highlights the effectiveness of our demonstration discriminative loss. **Scoring exp. known** and **Scoring opt. known** serve as oracle variants (with oracle knowledge of expertise levels and optimality labels, respectively) and achieve only marginally better performance than the original method in the low expertise test on HalfCheetah and Walker2d. This observation highlights the effectiveness of our approach in expertise-level estimation and optimality prediction when learning from imperfect demonstrations.

## C.3 REPRODUCIBILITY STATEMENT

To ensure the reproducibility of this work, details of the training parameters are provided in Tab. 13. All reported results are averaged over five random seeds (0–4) per condition/method, with mean and standard deviation reported. The corresponding code will be released as open-source upon publication of this work.

Table 13: Training Parameters

| Stage   | Parameter                                          | Value                                            |
|---------|----------------------------------------------------|--------------------------------------------------|
| Stage 1 | $f_\phi$ learning rate                             | $1 \times 10^{-4}$                               |
|         | $f_\phi$ batch size                                | 1000                                             |
|         | $f_\phi$ optimizer                                 | Adam                                             |
|         | Variance threshold $\epsilon$ for expertise levels | 0.0005                                           |
|         | Expertise levels estimation frequency              | Every 5 epochs                                   |
|         | $f_\phi$ training epochs                           | 50 (Ant, HalfCheetah, Swimmer)<br>100 (Walker2d) |
|         |                                                    |                                                  |
| Stage 2 | $\pi_\theta$ model                                 | SAC (Stable-Baselines3)                          |
|         | $\pi_\theta$ learning starts from                  | 100 steps                                        |
|         | $\pi_\theta$ batch size                            | 1024                                             |
|         | $\pi_\theta$ learning rate                         | $2 \times 10^{-3}$                               |
|         | $\pi_\theta$ replay buffer size                    | $1 \times 10^6$                                  |
|         | $\pi_\theta$ training steps / IL iteration         | $1.5 \times 10^4$                                |
|         | $f_\phi$ learning rate                             | $1 \times 10^{-4}$                               |
|         | $f_\phi$ batch size                                | 1024                                             |
|         | $f_\phi$ optimizer                                 | Adam                                             |
|         | $f_\phi$ updates epochs / IL iteration             | 500                                              |
|         | $\Delta_t, p$ for relabeling early stopping        | 30 (for 5 consecutive steps)                     |
|         | IL total iterations                                | 200                                              |
|         | checkpoints saving frequency                       | 1 per IL iteration                               |
